# Supplementary material for: H2 interaction with divalent cations in isostructural MOFs: a key study for variable temperature infrared spectroscopy
Source: Royal Society of Chemistry journal article supplement (doi:10.1039/c3dt51312b), 2013-01-01
Supplement: c3dt51312b.pdf [file c3dt51312b.pdf]

Electronic Supplementary information

H<sub>2</sub> Adsorption on Divalent Cations in Isostructural  
MOFs by Variable Temperature Infrared  
Spectroscopy

*Sachin M. Chavan<sup>ab\*</sup>, Olena Zavorotynska<sup>ac</sup>, Carlo Lamberti<sup>a</sup>, Silvia Bordiga<sup>a</sup>*

<sup>a</sup>Chemistry Department, NIS, centre of Excellence and INSTM università di Torino, via  
Pietro Giuria 7 and via Quarello 11, 10100, Torino, Italy

<sup>b</sup>Present address: Department of Chemistry, University of Oslo , P.O. Box 1033 Blindern, N-  
0315, Oslo, Norway, Email: [Sachin.chavan@kjemi.uio.no](mailto:Sachin.chavan@kjemi.uio.no)

<sup>c</sup>Present address: Institute for Energy Technology, Instituttveien 18, P.O. Box 40, N-2027,  
Kjeller, Norway

### XRPD of in Laboratory synthesized CPO-27-M

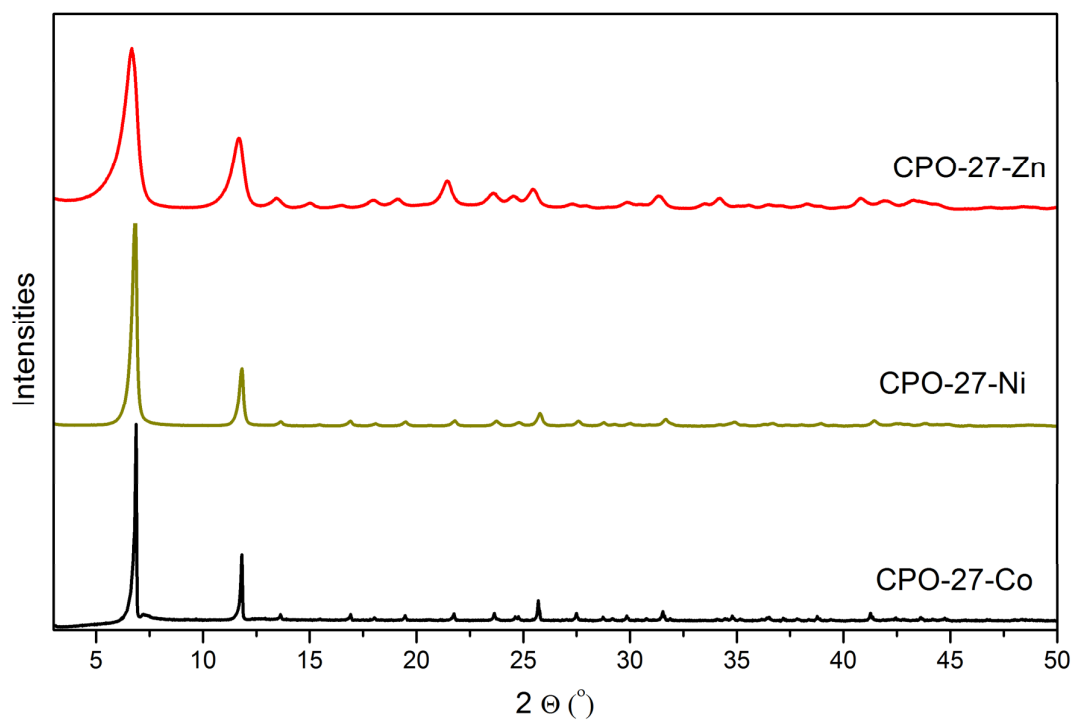

**Figure S1.** X-ray powder diffraction pattern of in home lab synthesized CPO-27-M ( $\lambda = 1.5406 \text{ \AA}$ )
